# Supplementary material for: 3D flower-like molybdenum disulfide modified graphite felt as a positive material for vanadium redox flow batteries
Source: Royal Society of Chemistry journal article supplement (doi:10.1039/d0ra02541k), 2020-01-01
Supplement: d0ra02541k1.pdf [file d0ra02541k1.pdf]

## **3D Flower-Like Molybdenum Disulfide Modified Graphite Felt as Positive Material for Vanadium Redox Flow Battery**

Lei Wang<sup>a</sup>, Shuangyu Li<sup>a</sup>, Dan Li<sup>b</sup>, Qin hao Xiao<sup>a</sup>, Wenheng Jing<sup>a,\*</sup>

<sup>a</sup>State Key Laboratory of Materials-Oriented Chemical Engineering, College of Chemical Engineering, Nanjing Tech University, Nanjing 211816, China

<sup>b</sup>Jiangsu Jiayi Thermal Power Co., Ltd., Changzhou 213200, China

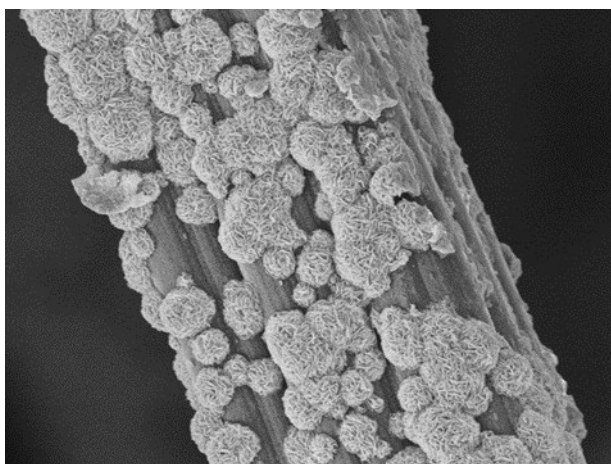

Fig.S1 The SEM images of the used MoS<sub>2</sub>/GF electrode after long-term operation.
